# Supplementary material for: Knowledge and barriers of PrEP delivery among diverse groups of potential PrEP users in Central Uganda
Source: PubMed Central journal article supplement (PMC7592843; doi:10.1371/journal.pone.0241399), 2020-10-28
Supplement: pone.0241399.s002.pdf [file pone.0241399.s002.pdf]

|                                                                                                                                                                                 |                                                                                                                                                                                                                                                                          |
|---------------------------------------------------------------------------------------------------------------------------------------------------------------------------------|--------------------------------------------------------------------------------------------------------------------------------------------------------------------------------------------------------------------------------------------------------------------------|
| Participant ID: <input type="text" value="PPU"/> - <input type="text"/> <input type="text"/> <input type="text"/>                                                               | Form Completion Date: <input type="text"/> <input type="text"/> <input type="text"/> <input type="text"/> <input type="text"/> <input type="text"/> <div style="text-align: center; font-size: small;"> <span>dd</span>      <span>mm</span>      <span>yy</span> </div> |
| <input type="checkbox"/> <i>discordant</i> <input type="checkbox"/> <i>Fisher Fork</i><br><input type="checkbox"/> <i>MSM</i> <input type="checkbox"/> <i>Female Sex worker</i> | <input type="checkbox"/> <i>pre-training</i> <input type="checkbox"/> <i>post-training</i>                                                                                                                                                                               |

## PPU Questionnaire, page 1 of 4

|   |                                                                                                                                                                                                                                                                                                                                                                                                                                                                                                                                                                                                                                                     |
|---|-----------------------------------------------------------------------------------------------------------------------------------------------------------------------------------------------------------------------------------------------------------------------------------------------------------------------------------------------------------------------------------------------------------------------------------------------------------------------------------------------------------------------------------------------------------------------------------------------------------------------------------------------------|
| 1 | Date of birth: <input type="text"/> <input type="text"/> <input type="text"/> <input type="text"/> <input type="text"/> <input type="text"/>                                                                                                                                                                                                                                                                                                                                                                                                                                                                                                        |
| 2 | Gender <input type="checkbox"/> <i>female</i> <input type="checkbox"/> <i>male</i>                                                                                                                                                                                                                                                                                                                                                                                                                                                                                                                                                                  |
| 3 | What is the participant's marital status?<br><input type="checkbox"/> <i>single</i> <input type="checkbox"/> <i>married monogamous</i> <input type="checkbox"/> <i>married polygamous</i> <input type="checkbox"/> <i>separated</i> <input type="checkbox"/> <i>divorced</i> <input type="checkbox"/> <i>widowed</i>                                                                                                                                                                                                                                                                                                                                |
| 4 | How many living children does the participant have? <input type="text"/> <input type="text"/> <i>number of children</i>                                                                                                                                                                                                                                                                                                                                                                                                                                                                                                                             |
| 5 | What is the participant's ethnic group or tribe? _____                                                                                                                                                                                                                                                                                                                                                                                                                                                                                                                                                                                              |
| 6 | How many years of school did the participant complete?<br><i>(Do not count repeat years)</i> <input type="text"/> <input type="text"/> <i>number of years</i>                                                                                                                                                                                                                                                                                                                                                                                                                                                                                       |
| 7 | What is the participant's occupation?<br><input type="checkbox"/> <i>professional</i> <input type="checkbox"/> <i>laborer/semi-skilled</i> <input type="checkbox"/> <i>trade/sales</i> <input type="checkbox"/> <i>farming/animal raising</i><br><input type="checkbox"/> <i>house wife</i> <input type="checkbox"/> <i>student</i> <input type="checkbox"/> <i>other, specify:</i> _____<br>7a. What is the participant's monthly income? (average over the last 3 months) <input type="text"/> |

Items 8- 27 are interviewer-administered questions and should be read aloud directly as written.

|   |                                                                                                                                                                                                                                                                                                                                                                                                                                                                                                                                                                                                                                                                                                                                                                                                                                                                                                                                                                                                                                                                                                                                                                                                                                                                                                                                                                                                                                                                                                                                                                                                                                                                                                                                                                                                                                                                                                                                                                                                                                                                                                                                                                                    |
|---|------------------------------------------------------------------------------------------------------------------------------------------------------------------------------------------------------------------------------------------------------------------------------------------------------------------------------------------------------------------------------------------------------------------------------------------------------------------------------------------------------------------------------------------------------------------------------------------------------------------------------------------------------------------------------------------------------------------------------------------------------------------------------------------------------------------------------------------------------------------------------------------------------------------------------------------------------------------------------------------------------------------------------------------------------------------------------------------------------------------------------------------------------------------------------------------------------------------------------------------------------------------------------------------------------------------------------------------------------------------------------------------------------------------------------------------------------------------------------------------------------------------------------------------------------------------------------------------------------------------------------------------------------------------------------------------------------------------------------------------------------------------------------------------------------------------------------------------------------------------------------------------------------------------------------------------------------------------------------------------------------------------------------------------------------------------------------------------------------------------------------------------------------------------------------------|
| 8 | <p><b>Newankubadde ebintubinoebimu biyinja okubangabikwasa ensonyiobanga bizibu okujjukira, ebintubinoebimu biyinja okubangabikwasa ensonyiobanga bizibu okujjukira, nkusaba ogezeeko okubyanukulamu butuufu bwabyo era ng'oli mwesimbu ngabwekisoboka.</b></p> <p>Mubulamu bwo, obulabe byo kukwatibwa akawuka obulaba otya?<br/> <input type="checkbox"/> <i>obulabe buli wagulu nnyo</i>    <input type="checkbox"/> <i>tebuli awo bwa' maanyi</i>      <input type="checkbox"/> <i>butono</i>                      <input type="checkbox"/> <i>tewali bu labe bwonna</i>      <input type="checkbox"/> <i>simanyi</i></p> <p>8a. Wali wekebezeseza akawuka ka silimu      <input type="checkbox"/> <i>yee</i>      <input type="checkbox"/> <i>nedda</i></p> <p>8b. <b>If yes in item 8a</b>, emirundi emeka?<br/> <input type="checkbox"/> <i>emirundi mingi mumwaka</i>    <input type="checkbox"/> <i>omurundi gumu mumwaka</i>    <input type="checkbox"/> <i>teguwera gumu mumwaka</i>    <input type="checkbox"/> <i>nakekebeza omulundi gumu kasookedde mbaawo</i></p> <p>8c. Mumwaka gumu mumaaso, olowooza obulabe bwo kukwatibwa akawuka kasilimu byenkanawa?<br/> <input type="checkbox"/> <i>obulabe buli wagulu nnyo</i>      <input type="checkbox"/> <i>tebuli awo bwa' maanyi</i>      <input type="checkbox"/> <i>butono</i>                      <input type="checkbox"/> <i>tewali bu labe bwonna</i>      <input type="checkbox"/> <i>simanyi</i></p> <p>8d. Neeyisa ki eteeka omuntu mubulabe bwokukwatibwa akawuka ka silimu? <b>mark all that apply</b><br/> <input type="checkbox"/> <i>okwegatta mubibikolwa byomukwano gatokozeseza kondomu</i>    <input type="checkbox"/> <i>okubera nabagalwa abassuka mwomu/ bangi</i><br/> <input type="checkbox"/> <i>obutamanya mbeera yamunno eyakawuka ka silimu</i>                      <input type="checkbox"/> <i>okweggatta nga oyita awafulumya obubi</i><br/> <input type="checkbox"/> <i>okubeera nendwadde eziyita mu kweggata ezijja bulikaseera</i>    <input type="checkbox"/> <i>okwekuba eddagala mu musywa</i>                      <input type="checkbox"/> <i>ebirala, biki:</i> _____</p> |
|---|------------------------------------------------------------------------------------------------------------------------------------------------------------------------------------------------------------------------------------------------------------------------------------------------------------------------------------------------------------------------------------------------------------------------------------------------------------------------------------------------------------------------------------------------------------------------------------------------------------------------------------------------------------------------------------------------------------------------------------------------------------------------------------------------------------------------------------------------------------------------------------------------------------------------------------------------------------------------------------------------------------------------------------------------------------------------------------------------------------------------------------------------------------------------------------------------------------------------------------------------------------------------------------------------------------------------------------------------------------------------------------------------------------------------------------------------------------------------------------------------------------------------------------------------------------------------------------------------------------------------------------------------------------------------------------------------------------------------------------------------------------------------------------------------------------------------------------------------------------------------------------------------------------------------------------------------------------------------------------------------------------------------------------------------------------------------------------------------------------------------------------------------------------------------------------|

Participant ID:  -

Form Completion Date:        
 dd mm yy

PPU Questionnaire, page 2 of 4

**Obutundu 9, 10 ne 11 bukwatera ku neeyisaayo mumwezi oguyise. Okwegatta oba ekikolwa kyokwegattawekyogeddwako, kizingiramu ekyomubukyala nekyo wofulumira obubi, naye tekitegeeza kwegatta nga oyita mukamwa. Ekigambo Kondomu oba akapiira kitegeeza akapiira akomusajja oba akomukazi. Akazigo wekogeddwako kitegeza ekikozesebwa okusereeza nga ekikolwa kyokwegata mumukwano kikolebwa.**

9 Gwe weyita musajja, mukazi, mukazi ngate oli musajja oba olina kyeweyita ekirala?  
 musajja  mukazi  mukazi ngate ndi musajja/ ebirala, biki: \_\_\_\_\_  
 musajja ngate ndi mukazi/ ebirala, biki: \_\_\_\_\_

9a. **If Male:** Oli mukomole?  yee  nedde

9b. Wegatta muikolwa ebyomukwano nabasajja, bakazi oba bombi?  basajja  bakazi  bombi

9c. Wegatta nofuna kyoyagala oba sente?  yee  nedda → **if no go to item 10**

9d. **If yes in item 9c:** Okwegatta nofuna sente, gewmulimugwo omukulu?  yee  nedda

10 Munnaku 30 eziyise, emirundi emeka gyewegase mubikolwa ebyomukwano?   emirundi gyo'kwegatta → **if 0 go to 11**

**Of those in item 10;** 10a. Mirundi emeka gyewegase ngo oyita awafulumya obubi?   emirundi gyo'kwegatta

10b. Mirundi emeka gyewegase ngo oyita mubukyala?   emirundi gyo'kwegatta

10c. Emirundi emeka gye wakozeza kondomu?   emirundi kondomu lwekozessedwa mukwegatta

10d. Emirundi emeka gye wakozeza ekiseza?   emirundi ekiseza lwekozessedwa mukwegatta

11 Munnaku 30 eziyise, abantu bameka bewegatta nabo mu bikolwa byo mukwano?   nnamba yabantu be wegasse nabo → **if 0 go to 12**

**Of the individuals in 11;** 11a. Kwabo bewegatta nabo, bameka boomanyi embera zaabwe eza kawuka ka silimu?   nnamba yaabo baamanyi embera zaabwe azakawuka

**Of the individuals in 11a;** 11b. Bameka abalina akawuka kasilimu?   nnamba yaabo abalina akawuka

11c. Bameka abatalina akawuka kasilimu?   nnamba yaabo abatalina akawuka

12 Kiki ekiyinda okukolebwa okukendeeza emikisa gy'okukwatibwa akawuka kamukenenya? **mark all that apply**

okukozesa akapiira  okukendeeza abantu bewegata nabo  okujanjaba endwadde ze kyama  okukomolebwa okwekisawo

ebirala, biki: \_\_\_\_\_

12a. Wali owuliddeko kunkola ya PrEP/eddagala erimiribwa olwo olwo? ?  yee  nedda

12b. **If yes in 12a, Nnyonyola PrEP kyeki? mark all that participant mentions** → **if no go to 12e**

ekerenda eriziyiza okukwatibwa akawuka ka silimu  ekerenda erimiribwa nga olowooza wegasse noyo alina akawuka  okukozesa ARV okuziyiza akawuka ka silimu nga tonaba kukafuna

ebirala, biki: \_\_\_\_\_

12c. Ani yakubulira ku nkola ya PrEP? **mark all that participant mentions**

abasawo  kukikutu gyempuliganya  mi kwano  ebirala, biki: \_\_\_\_\_

12d. Abantu ki bayinza okufunamu nga ba kozeseza PrEP? **mark all that participant mentions**

abantu abegatta olwa sente  abasajja abegatta nebasajja banabwe  Sero-discordant couples  abavubi  ebirala, biki: \_\_\_\_\_

12e. Banga lyenkana wa omuntu lye yandimaze nga akozesa PrEP?

lebanga lyonna eryobulamu  mubisera omuntu nga ali mukatyabaga ka ku kwatibwa akawuka  ebirala, biki: \_\_\_\_\_

Participant ID:  -    Form Completion Date:        
dd mm yy

PPU Questionnaire, page 3 of 4

**13 PrEP kwekukozesa eddagala eriweweza akawuka ka silimu/ARVs ngalikozesedwa abatalina kawuka okuzizaokukwatibwa nga tebanaba kubera numbera eyinza okukabasiiga.**  
 Ssinga PrEP abawo, wandyagadde okumukozesa okuziyiza okukwatibwa akawuka ka silimu?  
 yee **→ if yes, go to item 13b**  nedda  obolyawo

**13a. If no or maybe in item 13, Lwaki?**  
 netaaga obubaka  siri mu katyabaga ka  ndi musanyufu nenkola endala eyokuziyiza  
 obusingawo kukwatibwa silimu okukwatibwa akawuka ka silimu nga kondomu

sandyagadde kundaba nga mmira eddagala  ebirala, biki: \_\_\_\_\_  
 lya PrEP

**13b. If yes in item 13, Wandyagadde okumira eddagala eryo buli lunaku?**  yee  nedda  obolyawo  
**→ if no go to 13d**

**13c. If yes or maybe in 13b, Kiiki kyolowoza ekiyinda okukuyamba okujjukira okumira eddagala lya PrEP? buli lunnaku? mark all that participant mentions**  
 tewali  akadde  omwagalwa wange  mbikwataganya nebikolwa/emirimu  
 gyange egya buli lunaku  
 esaawa  akakebe mwentereka  radio  TV  ebirala, biki: \_\_\_\_\_  
 eddagala

**13d. Olowooza bik ebinyinza okukuwa obuzibu mukufuna eddagala lya PrEP singa oba olyetaze? mark all that participant mentions**  
 obutagala kundaba nalyo  okwerabira  okunnywa omwenge  obutafuna budde  
 bwakulinona  
 nga sekakasa nti ndyetaaga  ebirala, biki: \_\_\_\_\_

**14 Ssinga oba wakukkiriza PrEP, bifo ki byewandyagadde okulifunira?**  
 kumalwaliro ga  kumalwaliro ga  kumalwaliro go  VCT center  MARPS clinic  
 disitulikiti HC/dispensale bwananyini  
 ebirala, biki: \_\_\_\_\_

**14a Lwa wandyagadde okufuna PrEP okuva mu \_\_\_\_\_? (Insert response from item 14) mark all that apply**  
 banguya  tewali kusosolwa  waliwo okukuma  kumpi ne awaka  ebirala: \_\_\_\_\_  
 lwembera gyolimu ebyama okumala

**15 abantu abamira PrEP beetaga okukeberegwa akawuka ka silimu okukasa nti tebakalina. Emirundi emeka gyewandyagadde okukeberegwa akawuka ka silimu?**  
 buli mwezi  buli luvanyuma  buli luvanyuma  mulundigumu  ebirala: \_\_\_\_\_  
 lwa myezi essatu lwa myezi mukaaga mu mwaka

**Ebibuuzo namba 16-19 bikwata kungeri gyoyinza okuyisibwaamu nga omira eddagala lya PrEP ne ARVs okuziyiza akawuka akaleta mukenenya, Twagalaokumanya ky'olowoza nga tetusenziira kukuba nti ebintu ebyo binaabeerawo oba nedda. Mbulira oba nga okiririza ddala, okiriza, tokiriza oba tokiririza ddala, kubino ebina ebyogeddwaako wamanga;**

|    |                                                                                                                               | Nzikiririza ddala        | Nzikiriza                | Ssikiriza                | Ssikiririza Ddala        |
|----|-------------------------------------------------------------------------------------------------------------------------------|--------------------------|--------------------------|--------------------------|--------------------------|
| 16 | Singa mba nga mira PrEP oba ARVs.....<br>Njakuyisibwa bubu kumulimu oba bajjakungoba. Oba <input type="checkbox"/> Tekisanira | <input type="checkbox"/> | <input type="checkbox"/> | <input type="checkbox"/> | <input type="checkbox"/> |
| 17 | Nja kuvibwaako emikwako                                                                                                       | <input type="checkbox"/> | <input type="checkbox"/> | <input type="checkbox"/> | <input type="checkbox"/> |
| 18 | Famile yange ejjakunvaamu                                                                                                     | <input type="checkbox"/> | <input type="checkbox"/> | <input type="checkbox"/> | <input type="checkbox"/> |
| 19 | Abomukitundu kyange bajja kumpisa nga ekitagasa.                                                                              | <input type="checkbox"/> | <input type="checkbox"/> | <input type="checkbox"/> | <input type="checkbox"/> |

Participant ID: **PPU** –   Form Completion Date:        
dd mm yy

PPU Questionnaire, page 4 of 4

**Obutundu 20 - 23 bukwatera ku ngeri gy'okozesezza omwenge mu bbanga ery'omwaka ogumu oguyise.**

- |    |                                                                                                                                                                         |                              |                                |
|----|-------------------------------------------------------------------------------------------------------------------------------------------------------------------------|------------------------------|--------------------------------|
| 20 | Mu bbanga ery'omwaka ogumu oguyise, wawulirako muli obuswavu oba okwejjusa oluvannyuma lw'okunywa omwenge ?                                                             | <input type="checkbox"/> yee | <input type="checkbox"/> nedda |
| 21 | Mubbanga ery'omwakaogumu oguyise, waliwo mukwano gwoo ba owolugandalwo eyali akugambyeko ebintu byewayogera obabyewakolang'onnywedde omwenge kyokkangaggwe tobijjukira? | <input type="checkbox"/>     | <input type="checkbox"/>       |
| 22 | Mubbangaery'omwakaogumu oguyise, walemererwako okukola ekintu kyonna kyewali osuubirwa okukola olw'okunywa omwenge?                                                     | <input type="checkbox"/>     | <input type="checkbox"/>       |
| 23 | Waliwo oluusi lw'osookaokunywa ekintu kyona kumakya nga wakagolokoka?                                                                                                   | <input type="checkbox"/>     | <input type="checkbox"/>       |

**Item 24 is for sero-discordant participants only**

- |    |                                                                                            |                              |                                |
|----|--------------------------------------------------------------------------------------------|------------------------------|--------------------------------|
| 24 | Omwagalwa wo alina akawuka kasilimu ali kuddagala?                                         | <input type="checkbox"/> yee | <input type="checkbox"/> nedda |
|    | 24a. Wali obuliddeko omuntu yena kumbeera yo eya kawuka ka silimu nga ogyeko Omwagalwa wo? | <input type="checkbox"/> yee | <input type="checkbox"/> nedda |

**Item 25 is for sex worker participants only**

- |    |                                                                                                                                                                                                                                                                                            |
|----|--------------------------------------------------------------------------------------------------------------------------------------------------------------------------------------------------------------------------------------------------------------------------------------------|
| 25 | Bantu bakika ki bewegatta nabo bolina? <b>list all that apply</b><br><input type="checkbox"/> abo aba ssente <input type="checkbox"/> bakwano bange <input type="checkbox"/> abampa byenjagala<br><input type="checkbox"/> oba abasajja abakulu <input type="checkbox"/> abala bani: _____ |
|----|--------------------------------------------------------------------------------------------------------------------------------------------------------------------------------------------------------------------------------------------------------------------------------------------|

**Item 26 is for MSM participants only**

- |    |                                               |                              |                                |
|----|-----------------------------------------------|------------------------------|--------------------------------|
| 26 | Wali obuliddeko omuntu yenna enegatta yo eno? | <input type="checkbox"/> yee | <input type="checkbox"/> nedda |
|----|-----------------------------------------------|------------------------------|--------------------------------|

**Item 27 is for fish folk participants only**

- |    |                                                   |                                           |                                |
|----|---------------------------------------------------|-------------------------------------------|--------------------------------|
| 27 | Emyalo emeka gyo kolero ko?                       | <input type="text"/> <input type="text"/> | namba ye myalo                 |
|    | 27a. Olina bewegatta nabo mumukwano bameka?       | <input type="text"/> <input type="text"/> | namba yabo be negatta nabo     |
|    | 27b. Bonna bewegatta nabo bava kumwalo gwegumuko? | <input type="checkbox"/> yee              | <input type="checkbox"/> nedda |
