# Supplementary material for: Knowledge and barriers of PrEP delivery among diverse groups of potential PrEP users in Central Uganda
Source: PubMed Central journal article supplement (PMC7592843; doi:10.1371/journal.pone.0241399), 2020-10-28
Supplement: pone.0241399.s003.pdf [file pone.0241399.s003.pdf]

## Data dictionary\_Knowledge and Barriers of PrEP Delivery\_in Central Uganda

| No | Variable_name | Generic Name       | Type | Description                                            | Legal Range | Format / Choices / Display width |
|----|---------------|--------------------|------|--------------------------------------------------------|-------------|----------------------------------|
| 1  | PTID_Req      | PTID               | str  | Participant ID                                         | 001-999     | Format = nnn                     |
| 2  | Form_year     | FormYear           | dt   | Form completion Year                                   | 2017-2018   | Format = yyyy                    |
| 3  | SimpleChoice  | ParticipantType    | int  | Type of participant:                                   | 1,2,3,4     | 1 = serodiscordant couples       |
|    |               |                    |      |                                                        |             | 2 = fisher folk                  |
|    |               |                    |      |                                                        |             | 3 = men who have sex with men    |
|    |               |                    |      |                                                        |             | 4 = female sex workers           |
| 4  | SimpleChoice  | SurveyType         | int  | Type of survey:                                        | 1,2         | 1 = pre-training                 |
|    |               |                    |      |                                                        |             | 2 = post-training                |
| 5  | SimpleChoice  | Recruitment source | int  | Recruitment source                                     | 1,2,3       | 1 = urban                        |
|    |               |                    |      |                                                        |             | 2 = peri-urban                   |
|    |               |                    |      |                                                        |             | 3 = rural                        |
| 6  | birth_year    | BirthYear          | dt   | Year of Birth                                          | 1950 – 2000 | Format = yyyy                    |
| 7  | SimpleChoice  | Sex                | int  | Sex of Participant                                     | 1,2         | 1 = female                       |
|    |               |                    |      |                                                        |             | 2 = male                         |
| 8  | SimpleChoice  | MaritalStatus      | int  | Participant's marital status                           | 1,2,3,4,5,6 | 1 = single                       |
|    |               |                    |      |                                                        |             | 2 = married monogamous           |
|    |               |                    |      |                                                        |             | 3 = married polygamous           |
|    |               |                    |      |                                                        |             | 4 = separated                    |
|    |               |                    |      |                                                        |             | 5 = divorced                     |
|    |               |                    |      |                                                        |             | 6 = widowed                      |
| 9  | SimpleNumber  | YrsSchool          | int  | How many years of school did the participant complete? | 0-25        | Format = nn                      |

## Data dictionary\_Knowledge and Barriers of PrEP Delivery\_in Central Uganda

|    |              |                         |     |                                                                      |               |                            |
|----|--------------|-------------------------|-----|----------------------------------------------------------------------|---------------|----------------------------|
|    |              |                         |     |                                                                      |               | 1 = professional           |
|    |              |                         |     |                                                                      |               | 2 = laborer/semi-skilled   |
|    |              |                         |     |                                                                      |               | 3 = trade/sales            |
|    |              |                         |     |                                                                      |               | 4 = farming/animal raising |
|    |              |                         |     |                                                                      |               | 5 = house wife             |
|    |              |                         |     |                                                                      |               | 6 = student                |
| 10 | SimpleChoice | Occupation              | int | What is the participant's occupation?                                | 1,2,3,4,5,6,7 | 7 = other specify          |
| 11 | SimpleNumber | MonthIncome             | int | What is the participant's monthly income (UGX)?                      |               | Format = nnnnnnnnn         |
|    |              |                         |     |                                                                      |               | 1 = high risk              |
|    |              |                         |     |                                                                      |               | 2 = moderate risk          |
|    |              |                         |     |                                                                      |               | 3 = low risk               |
|    |              |                         |     |                                                                      |               | 4 = no risk                |
| 12 | SimpleChoice | HIVLifetimeRisk         | int | In your lifetime, how do you perceive your risk of getting HIV?      | 1,2,3,4,5     | 5 = don't know             |
|    |              |                         |     |                                                                      |               | 1 = female                 |
|    |              |                         |     |                                                                      |               | 2 = male                   |
| 13 | SimpleChoice | Gender                  | int | Do you consider yourself male, female, transgender or other?         | 1,2,3         | 3 = transgender            |
|    |              |                         |     |                                                                      |               | 1 = yes                    |
| 14 | SimpleChoice | HeardPrEP               | int | Have you ever heard of PrEP?                                         | 1,2           | 2 = no                     |
|    |              |                         |     |                                                                      |               | 0 = 0                      |
| 15 | SimpleCheck  | DP_PillHIVtreat         | ck  | Describe PrEP: pill to treat HIV infection                           |               | 1 = 1                      |
|    |              |                         |     |                                                                      |               | 0 = 0                      |
| 16 | SimpleCheck  | DP_PillAfterHIVExposure | ck  | Describe PrEP: pill taken after potential exposure to HIV            |               | 1 = 1                      |
|    |              |                         |     |                                                                      |               | 0 = 0                      |
| 17 | SimpleCheck  | DP_ARVPreventHIV        | ck  | Describe PrEP: use of ARV drugs to prevent acquisition of HIV before |               | 1 = 1                      |

## Data dictionary\_Knowledge and Barriers of PrEP Delivery\_in Central Uganda

|    |             |                          |     |                                               |  |                     |
|----|-------------|--------------------------|-----|-----------------------------------------------|--|---------------------|
|    |             |                          |     | exposure                                      |  |                     |
| 18 | SimpleCheck | DP_others                | ck  | Describe PrEP: others                         |  | 0 = 0<br>1 = 1      |
| 19 | Comments    | DP_specify               | str | Specify other descriptions of PrEP            |  | Display width = 200 |
| 20 | SimpleCheck | PrEPInfo_HCW             | ck  | Who told you about PrEP: Health Care Worker   |  | 0 = 0<br>1 = 1      |
| 21 | SimpleCheck | PrEPInfo_Media           | ck  | Who told you about PrEP: Media                |  | 0 = 0<br>1 = 1      |
| 22 | SimpleCheck | PrEPInfo_Friend          | ck  | Who told you about PrEP: Friend               |  | 0 = 0<br>1 = 1      |
| 23 | SimpleCheck | PrEPInfo_Other           | ck  | Who told you about PrEP: Other                |  | 0 = 0<br>1 = 1      |
| 24 | Comments    | PrEPInfo_specify         | str | Specify other PrEP information sources        |  | Display width = 200 |
| 25 | SimpleCheck | PrEPBenefit_sexworkers   | ck  | PrEP beneficiaries: sex workers               |  | 0 = 0<br>1 = 1      |
| 26 | SimpleCheck | PrEPBenefit_MSM          | ck  | PrEP beneficiaries: men who have sex with men |  | 0 = 0<br>1 = 1      |
| 27 | SimpleCheck | PrEPBenefit_SDC          | ck  | PrEP beneficiaries: serodiscordant couples    |  | 0 = 0<br>1 = 1      |
| 28 | SimpleCheck | PrEPBenefit_FF           | ck  | PrEP beneficiaries: fisher folk               |  | 0 = 0<br>1 = 1      |
| 29 | SimpleCheck | PrEPBenefit_Alcoholusers | ck  | PrEP beneficiaries: Alcohol users             |  | 0 = 0<br>1 = 1      |
| 30 | SimpleCheck | PrEPBenefit_Bfeedmothers | ck  | PrEP beneficiaries: Breastfeeding Mothers     |  | 0 = 0<br>1 = 1      |

## Data dictionary\_Knowledge and Barriers of PrEP Delivery\_in Central Uganda

|    |              |                          |     |                                                                                           |               |                                                |
|----|--------------|--------------------------|-----|-------------------------------------------------------------------------------------------|---------------|------------------------------------------------|
| 31 | SimpleCheck  | PrEPBenefit_HIV+persons  | ck  | PrEP beneficiaries: HV positive persons                                                   |               | 0 = 0<br>1 = 1                                 |
| 32 | SimpleCheck  | PrEPBenefit_NonHIVperons | ck  | PrEP beneficiaries: HIV negative persons                                                  |               | 0 = 0<br>1 = 1                                 |
| 33 | SimpleCheck  | PrEPBenefit_MAPRS        | ck  | PrEP beneficiaries: Most At Risk Populations                                              |               | 0 = 0<br>1 = 1                                 |
| 34 | SimpleCheck  | PrEPBenefit_Raped        | ck  | PrEP beneficiaries: Raped Persons                                                         |               | 0 = 0<br>1 = 1                                 |
| 35 | SimpleCheck  | PrEPBenefit_Youth        | ck  | PrEP beneficiaries: youth                                                                 |               | 0 = 0<br>1 = 1                                 |
| 36 | SimpleCheck  | PrEPBenefit_Dontknow     | ck  | PrEP beneficiaries: Don't Know                                                            |               | 0 = 0<br>1 = 1                                 |
| 37 | SimpleChoice | PrEPDuration             | int | How long should someone use PrEP?                                                         | 1,2,3,4,5,6,7 | 1 = lifelong                                   |
|    |              |                          |     |                                                                                           |               | 2 = During periods of risk for HIV acquisition |
|    |              |                          |     |                                                                                           |               | 3 = 1 month or less                            |
|    |              |                          |     |                                                                                           |               | 4 = 3-6 months                                 |
|    |              |                          |     |                                                                                           |               | 5 = 1 year                                     |
|    |              |                          |     |                                                                                           |               | 6 = 2 years                                    |
|    |              |                          |     |                                                                                           |               | 7 = Dont know                                  |
| 38 | SimpleChoice | PrEPWillingness          | int | In case PrEP was made available, would you be willing to use it to prevent HIV infection? | 1,2,3         | 1 = yes                                        |
|    |              |                          |     |                                                                                           |               | 2 = no                                         |
|    |              |                          |     |                                                                                           |               | 3 = maybe                                      |
| 39 | SimpleCheck  | NonPrEP_MoreInfo         | ck  | Reason for no PrEP use: Need more Information                                             |               | 0 = 0<br>1 = 1                                 |

## Data dictionary\_Knowledge and Barriers of PrEP Delivery\_in Central Uganda

|    |             |                         |    |                                                                        |                |
|----|-------------|-------------------------|----|------------------------------------------------------------------------|----------------|
| 40 | SimpleCheck | NonPrEP_NoRisk          | ck | Reason for no PrEP use: Not perceived to be at risk                    | 0 = 0<br>1 = 1 |
| 41 | SimpleCheck | NonPrEP_Happyother      | ck | Reason for no PrEP use: Happy with other prevention tools like condoms | 0 = 0<br>1 = 1 |
| 42 | SimpleCheck | NonPrEP_Notseen         | ck | Reason for no PrEP use: I would not want to be seen taking PrEP        | 0 = 0<br>1 = 1 |
| 43 | SimpleCheck | NonPrEP_SideEffects     | ck | Reason for no PrEP use: Side Effects                                   | 0 = 0<br>1 = 1 |
| 44 | SimpleCheck | NonPrEP_PillBurden      | ck | Reason for no PrEP use: Pill Burden                                    | 0 = 0<br>1 = 1 |
| 45 | SimpleCheck | Challenge_stigma        | ck | Possible challenges to get PrEP: Stigma                                | 0 = 0<br>1 = 1 |
| 46 | SimpleCheck | Challenge_Forgetting    | ck | Possible challenges to get PrEP: Forgetting                            | 0 = 0<br>1 = 1 |
| 47 | SimpleCheck | Challenge_Alcoholuse    | ck | Possible challenges to get PrEP: Alcohol use                           | 0 = 0<br>1 = 1 |
| 48 | SimpleCheck | Challenge_BusySchedule  | ck | Possible challenges to get PrEP: Busy Schedule                         | 0 = 0<br>1 = 1 |
| 49 | SimpleCheck | Challenge_Notneed       | ck | Possible challenges to get PrEP: Not sure I need it                    | 0 = 0<br>1 = 1 |
| 50 | SimpleCheck | Challenge_Transport     | ck | Possible challenges to get PrEP: Transport                             | 0 = 0<br>1 = 1 |
| 51 | SimpleCheck | Challenge_Accessibility | ck | Possible challenges to get PrEP: Accessibility                         | 0 = 0<br>1 = 1 |
| 52 | SimpleCheck | Challenge_DrugCost      | ck | Possible challenges to get PrEP: Drug Cost                             | 0 = 0<br>1 = 1 |

## Data dictionary\_Knowledge and Barriers of PrEP Delivery\_in Central Uganda

|    |             |                                    |    |                                                                       |                |
|----|-------------|------------------------------------|----|-----------------------------------------------------------------------|----------------|
| 53 | SimpleCheck | Challenge_DrugStockout             | ck | Possible challenges to get PrEP: Drug Stockout                        | 0 = 0<br>1 = 1 |
| 54 | SimpleCheck | Challenge_HCWAttitude              | ck | Possible challenges to get PrEP: Health Care Worker Attitude          | 0 = 0<br>1 = 1 |
| 55 | SimpleCheck | Challenge_KnowledgeGap             | ck | Possible challenges to get PrEP: Knowledge Gap                        | 0 = 0<br>1 = 1 |
| 56 | SimpleCheck | Challenge_PillBurden               | ck | Possible challenges to get PrEP: Pill Burden                          | 0 = 0<br>1 = 1 |
| 57 | SimpleCheck | Challenge_SideEffects              | ck | Possible challenges to get PrEP: Side Effects                         | 0 = 0<br>1 = 1 |
| 58 | SimpleCheck | PreferredFacility_DistrictHospital | ck | From which facilities would you prefer to get PrEP: District Hospital | 0 = 0<br>1 = 1 |
| 59 | SimpleCheck | PreferredFacility_HealthCenter     | ck | From which facilities would you prefer to get PrEP: Health Center     | 0 = 0<br>1 = 1 |
| 60 | SimpleCheck | PreferredFacility_PrivateClinic    | ck | From which facilities would you prefer to get PrEP: Private Clinic    | 0 = 0<br>1 = 1 |
| 61 | SimpleCheck | PreferredFacility_VCT              | ck | From which facilities would you prefer to get PrEP: VCT Center        | 0 = 0<br>1 = 1 |
| 62 | SimpleCheck | PreferredFacility_MARPClinic       | ck | From which facilities would you prefer to get PrEP: MARP Clinic       | 0 = 0<br>1 = 1 |
| 63 | SimpleCheck | PreferredFacility_Other            | ck | From which facilities would you prefer to get PrEP: Other             | 0 = 0<br>1 = 1 |
| 64 | SimpleCheck | ReasonPrefer_Fasterservice         | ck | Reason why prefer stated facilities: Faster service                   | 0 = 0<br>1 = 1 |
| 65 | SimpleCheck | ReasonPrefer_LessStigma            | ck | Reason why prefer stated facilities: Less Stigma                      | 0 = 0<br>1 = 1 |

## Data dictionary\_Knowledge and Barriers of PrEP Delivery\_in Central Uganda

|    |             |                            |    |                                                                                                |  |                |
|----|-------------|----------------------------|----|------------------------------------------------------------------------------------------------|--|----------------|
| 66 | SimpleCheck | ReasonPrefer_Privacy       | ck | Reason why prefer stated facilities:<br>Privacy                                                |  | 0 = 0<br>1 = 1 |
| 67 | SimpleCheck | ReasonPrefer_CloserHome    | ck | Reason why prefer stated facilities:<br>Closer to my Home                                      |  | 0 = 0<br>1 = 1 |
| 68 | SimpleCheck | ReasonPrefer_Accessibility | ck | Reason why prefer stated facilities:<br>Accessibility                                          |  | 0 = 0<br>1 = 1 |
| 69 | SimpleCheck | ReasonPrefer_Availability  | ck | Reason why prefer stated facilities:<br>Availability                                           |  | 0 = 0<br>1 = 1 |
| 70 | SimpleCheck | ReasonPrefer_Convenience   | ck | Reason why prefer stated facilities:<br>Convenience                                            |  | 0 = 0<br>1 = 1 |
| 71 | SimpleCheck | ReasonPrefer_FreeServices  | ck | Reason why prefer stated facilities: Free<br>Services                                          |  | 0 = 0<br>1 = 1 |
| 72 | SimpleCheck | ReasonPrefer_GoodHCW       | ck | Reason why prefer stated facilities:<br>Good attitude and experience of Health<br>Care Workers |  | 0 = 0<br>1 = 1 |
| 73 | SimpleCheck | ReasonPrefer_Trust         | ck | Reason why prefer stated facilities:<br>Trust and Reliability                                  |  | 0 = 0<br>1 = 1 |

Key: int – Integer, dt – Date, ck – Check box, str - String
